# Supplementary material for: Bioinspired assembly of layered double hydroxide/carboxymethyl chitosan bionanocomposite hydrogel films
Source: Royal Society of Chemistry journal article supplement (doi:10.1039/c3tb21608j), 2013-12-06
Supplement: c3tb21608j.pdf [file c3tb21608j.pdf]

(Supporting Information)

**Bioinspired assembly of layered double  
hydroxide/carboxymethyl chitosan bionanocomposite  
hydrogel films**

**Yi Wang and Dun Zhang\***

*Key Laboratory of Marine Environmental Corrosion and Bio-fouling, Institute of Oceanology,  
Chinese Academy of Sciences, Qingdao 266071, P.R. China*

[\*] Prof. Dun Zhang

Key Laboratory of Marine Environmental Corrosion and Bio-fouling, Institute of Oceanology,  
Chinese Academy of Sciences, Qingdao 266071, P.R. China. Fax: +86 532 82898960; Tel: +86  
532 82898960; E-mail: zhangdun@qdio.ac.cn

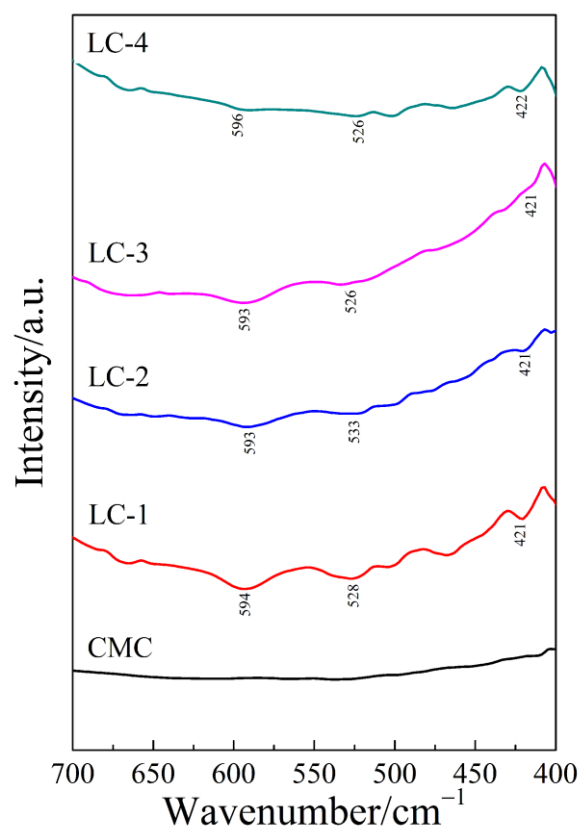

**Fig. S1** FT-IR spectra of the pure CMC film and the C-LDH/CMC bionanocomposite films with different C-LDHs mass contents (in the range of 700-400 cm<sup>-1</sup>)

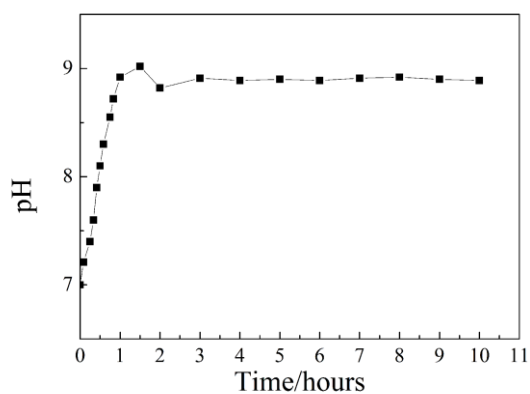

**Fig. S2** Variation of pH with the reaction time

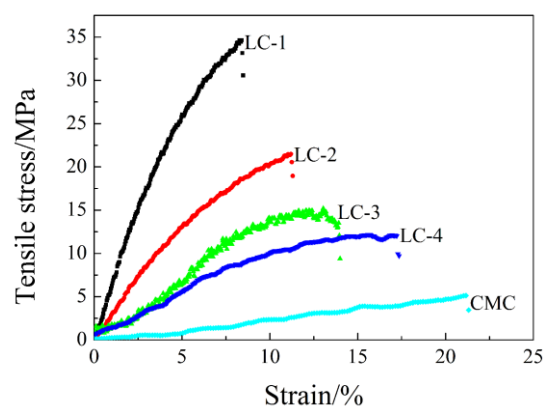

**Fig. S3** Tensile strength–strain curves for the pure CMC film and the C-LDH/CMC bionanocomposite films with different C-LDHs mass contents
